# Supplementary material for: The substrate specificity in the O-demethylation of 4-alkylguaiacols by cytochrome P450 AgcAP450
Source: Royal Society of Chemistry journal article supplement (doi:10.1039/d3cy00123g), 2023-01-01
Supplement: d3cy00123g2.pdf [file d3cy00123g2.pdf]

## Supporting information

### **The substrate specificity in the O-demethylation of 4-alkylguaiacols by Cytochrome P450 AgcA<sub>P450</sub>**

Sónia F Santos<sup>1,2</sup>, Rajesh Reddy Bommareddy<sup>2</sup>, Gary W Black<sup>2</sup>,  
Warispreet Singh<sup>\*2</sup>, Meilan Huang<sup>1\*</sup>

<sup>1</sup> School of Chemistry & Chemical Engineering, Queen's University, Belfast,  
BT9 5AG, United Kingdom

<sup>2</sup> Hub for Biotechnology in Build Environment, Newcastle upon Tyne, United Kingdom,  
Department of Applied Sciences, Northumbria University, Newcastle upon Tyne,  
NE1 8ST, United Kingdom

Corresponding Authors: [m.huang@qub.ac.uk](mailto:m.huang@qub.ac.uk), [w.singh@northumbria.ac.uk](mailto:w.singh@northumbria.ac.uk)

## Table of Contents

|                                                                                                                                                                                                                                                                                                                                                                                                                                                                                               |   |
|-----------------------------------------------------------------------------------------------------------------------------------------------------------------------------------------------------------------------------------------------------------------------------------------------------------------------------------------------------------------------------------------------------------------------------------------------------------------------------------------------|---|
| <b>Figure S1</b> Sequence alignment of the AgcA <sub>P450</sub> and GcoA <sub>P450</sub> enzymes using Clustal-Omega webserver developed by the European Bioinformatics Institute. Marked in green we have the active centre conserved residues between these two proteins. Marked in red we have the non-conserved residues, an Isoleucine (GcoA <sub>P450</sub> ) replaced by a Leucine (AgcA <sub>P450</sub> ) and a Threonine (GcoA) replaced by an Alanine (AgcA <sub>P450</sub> ). .... | 3 |
| <b>Figure S2</b> RMSD for the backbone C $\alpha$ atoms of AgcA <sub>P450</sub> protein (in blue) and the RMSD of the heavy atoms of substrate Guaiacol (in orange). ....                                                                                                                                                                                                                                                                                                                     | 4 |
| <b>Figure S3</b> RMSD for the backbone C $\alpha$ atoms of AgcA <sub>P450</sub> protein (in blue) and the RMSD of the heavy atoms of substrate 4-methylguaiacol (in orange). ....                                                                                                                                                                                                                                                                                                             | 4 |
| <b>Figure S4</b> RMSD for the backbone C $\alpha$ atoms of AgcA <sub>P450</sub> protein (in blue) and the RMSD of the heavy atoms of substrate 4-ethylguaiacol (in orange). ....                                                                                                                                                                                                                                                                                                              | 4 |
| <b>Figure S5</b> RMSD for the backbone C $\alpha$ atoms of AgcA <sub>P450</sub> protein (in blue) and the RMSD of the heavy atoms of substrate 4-propylguaiacol (in orange). ....                                                                                                                                                                                                                                                                                                             | 4 |
| <b>Figure S6</b> The radial distribution function of AgcA <sub>P450</sub> protein in complex with guaiacol. The dashed blue line represents at least one water molecule near the Iron-oxo complex of Cpd I during the MD simulations. ....                                                                                                                                                                                                                                                    | 5 |
| <b>Figure S7</b> The radial distribution function of AgcA <sub>P450</sub> protein in complex with 4-methylguaiacol. The dashed blue line represents at least one water molecule near the Iron-oxo complex of Cpd I during the MD simulations. ....                                                                                                                                                                                                                                            | 5 |
| <b>Figure S8</b> The radial distribution function of AgcA <sub>P450</sub> protein in complex with 4-ethylguaiacol. The dashed blue line represents at least one water molecule near the Iron-oxo complex of Cpd I during the MD simulations. ....                                                                                                                                                                                                                                             | 5 |
| <b>Figure S9</b> The radial distribution function of AgcA <sub>P450</sub> protein in complex with 4-propylguaiacol. The dashed blue line represents at least one water molecule near the Iron-oxo complex of Cpd I during the MD simulations. ....                                                                                                                                                                                                                                            | 5 |
| <b>Figure S10</b> Distance between I13 and A169 during the MD simulation of AgcA <sub>P450</sub> protein in complex with Guaiacol. ....                                                                                                                                                                                                                                                                                                                                                       | 6 |
| <b>Figure S11</b> Distance between I13 and A169 during the MD simulation of AgcA <sub>P450</sub> protein in complex with 4-methylguaiacol. ....                                                                                                                                                                                                                                                                                                                                               | 6 |
| <b>Figure S12</b> Distance between I13 and A169 during the MD simulation of AgcA <sub>P450</sub> protein in complex with 4-ethylguaiacol. ....                                                                                                                                                                                                                                                                                                                                                | 6 |
| <b>Figure S13</b> Distance between I13 and A169 during the MD simulation of AgcA <sub>P450</sub> protein in complex with 4-propylguaiacol. ....                                                                                                                                                                                                                                                                                                                                               | 6 |
| <b>Figure S14</b> Distance between the methoxy group of guaiacol and the oxygen atom of Fe(IV)=O. ....                                                                                                                                                                                                                                                                                                                                                                                        | 6 |
| <b>Figure S15</b> Distance between the methoxy group of 4-methylguaiacol and the oxygen atom of Fe(IV)=O. ....                                                                                                                                                                                                                                                                                                                                                                                | 7 |
| <b>Figure S16</b> Distance between the methoxy group of 4-ethylguaiacol and the oxygen atom of Fe(IV)=O. ....                                                                                                                                                                                                                                                                                                                                                                                 | 7 |
| <b>Figure S17</b> Distance between the methoxy group of 4-propylguaiacol and the oxygen atom of Fe(IV)=O. ....                                                                                                                                                                                                                                                                                                                                                                                | 7 |
| <b>Figure S18</b> The oxidation 4-propylguaiacol in the active site of AgcA <sub>P450</sub> enzyme studied using QM/MM calculations at M=4. The reaction profile of the hydrogen atom transfer (HAT) catalysed by Cpd I was computed using the UB3LYP functional with D3BJ dispersion correction and the def2-TZVP basis set for M=4. ....                                                                                                                                                    | 8 |
| <b>Table S1</b> QMMM calculated spin densities of the oxidation 4-propylguaiacol in the active site of AgcA <sub>P450</sub> at M=2 ....                                                                                                                                                                                                                                                                                                                                                       | 8 |
| <b>Table S2</b> QMMM calculated spin densities of the oxidation 4-propylguaiacol in the active site of AgcA <sub>P450</sub> at M=4 ....                                                                                                                                                                                                                                                                                                                                                       | 8 |

>tr|A0A385L6C3|A0A385L6C3\_RHORH Cytochrome P450 OS=Rhodococcus  
rhodochrous OX=1829 GN=C6369\_001540 PE=3 SV=1

MTSTHSFIDEITIEELEADPYPFYERLRKEAPIAYVPALGMIVSTKELCAEISKDDANW  
PAVISAAGGRFTGPQALLNTNGDEHRNLRDMVEPHLQPSAVDKYIDDLVRPFARQRIAEF  
ENDGHADIVAAYCEPVSVRALGDLLGLGDVSTEKLREWFHNLSVSFTNAAVDENGEFANP  
EGFAPGDRAKAEIIAHVDPKIDKWIVEPDHSAISHWLHDGMPEGQTRSRDVIYPNLYVFL  
LGAMQEPGHAMATTLA GLFSRPDQLERVIDDPTLIPRAASEGMRWVAPIWSAAVKRAARE  
VTVGGVTLPEGSIVMLSYGSANQDENAYNAPTEYDLDRALVPNMTFGGGKHACAGTYFAN  
AVVRIGLEELLEAIPNIERDETHEVDFWGWGFRGPKOLFVKWEV

Sequence alignment of the AgcA<sub>p450</sub> and GcoA<sub>p450</sub> enzymes. GcoA<sub>p450</sub> was used as a template for the construction of the model by homology.

[illegible]

**Figure S1** Sequence alignment of the AgcA<sub>P450</sub> and GcoA<sub>P450</sub> enzymes using Clustal-Omega webserver developed by the European Bioinformatics Institute. Marked in green we have the active centre conserved residues between these two proteins. Marked in red we have the non-conserved residues, an Isoleucine (GcoA<sub>P450</sub>) replaced by a Leucine (AgcA<sub>P450</sub>) and a Threonine (GcoA) replaced by an Alanine (AgcA<sub>P450</sub>).

## RMSD of AgcA<sub>P450</sub> in complex with each substrate

### AgcA<sub>P450</sub> with guaiacol

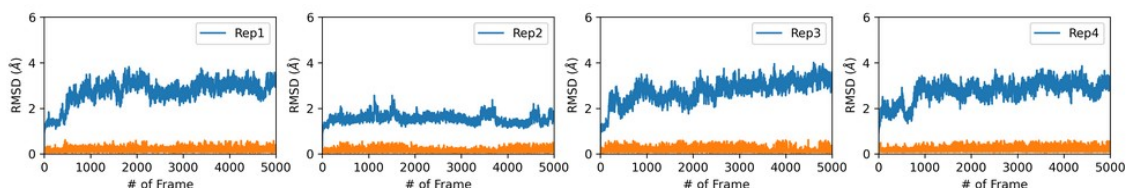

**Figure S2** RMSD for the backbone C $\alpha$  atoms of AgcA<sub>P450</sub> protein (in blue) and the RMSD of the heavy atoms of substrate Guaiacol (in orange).

### AgcA<sub>P450</sub> with 4-methylguaiacol

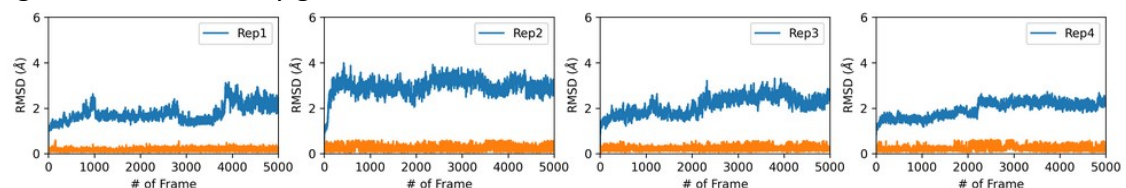

**Figure S3** RMSD for the backbone C $\alpha$  atoms of AgcA<sub>P450</sub> protein (in blue) and the RMSD of the heavy atoms of substrate 4-methylguaiacol (in orange).

### AgcA<sub>P450</sub> with 4-ethylguaiacol

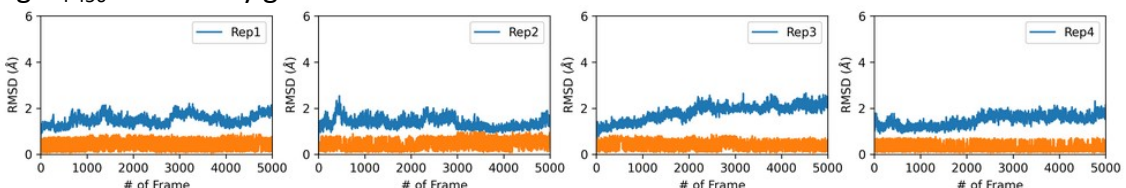

**Figure S4** RMSD for the backbone C $\alpha$  atoms of AgcA<sub>P450</sub> protein (in blue) and the RMSD of the heavy atoms of substrate 4-ethylguaiacol (in orange).

### AgcA<sub>P450</sub> with 4-propylguaiacol

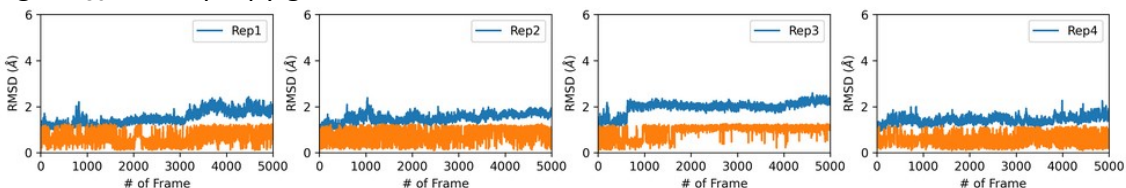

**Figure S5** RMSD for the backbone C $\alpha$  atoms of AgcA<sub>P450</sub> protein (in blue) and the RMSD of the heavy atoms of substrate 4-propylguaiacol (in orange).

## Radial distribution functions in relation to the Cpd I complex in the active site

### AgcA<sub>P450</sub> with guaiacol

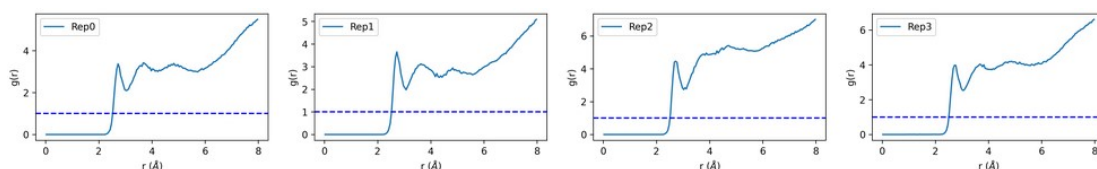

**Figure S6** The radial distribution function of AgcA<sub>P450</sub> protein in complex with guaiacol. The dashed blue line represents at least one water molecule near the Iron-oxo complex of Cpd I during the MD simulations.

#### AgcA<sub>P450</sub> with 4-methylguaiacol

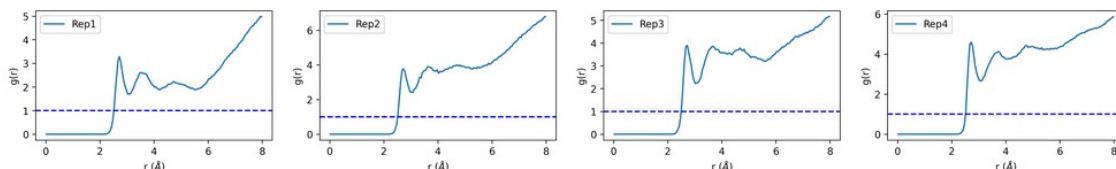

**Figure S7** The radial distribution function of AgcA<sub>P450</sub> protein in complex with 4-methylguaiacol. The dashed blue line represents at least one water molecule near the Iron-oxo complex of Cpd I during the MD simulations.

#### AgcA<sub>P450</sub> with 4-ethylguaiacol

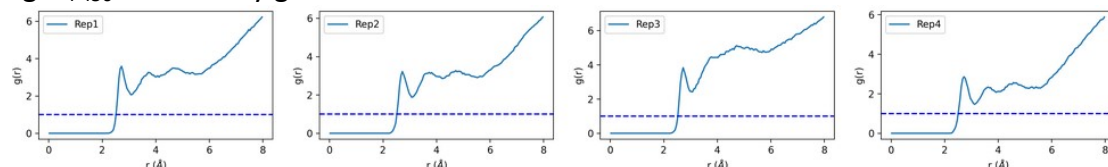

**Figure S8** The radial distribution function of AgcA<sub>P450</sub> protein in complex with 4-ethylguaiacol. The dashed blue line represents at least one water molecule near the Iron-oxo complex of Cpd I during the MD simulations.

#### AgcA<sub>P450</sub> with 4-propylguaiacol

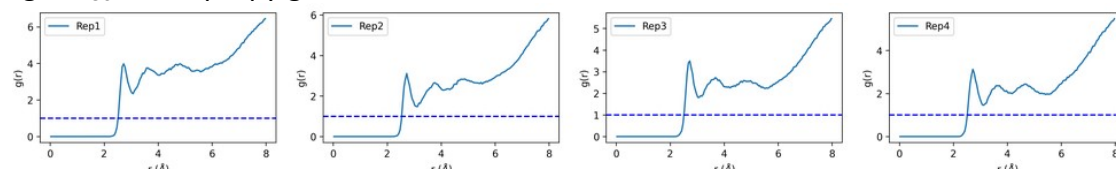

**Figure S9** The radial distribution function of AgcA<sub>P450</sub> protein in complex with 4-propylguaiacol. The dashed blue line represents at least one water molecule near the Iron-oxo complex of Cpd I during the MD simulations.

## Distance of the residues A169 and I13 acting as gate of the substrate access channel

#### AgcA<sub>P450</sub> with guaiacol

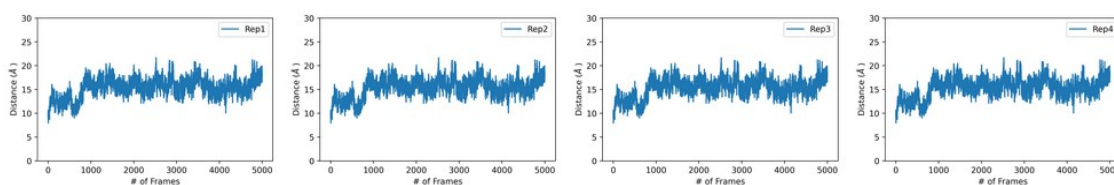

**Figure S10** Distance between I13 and A169 during the MD simulation of AgcA<sub>P450</sub> protein in complex with Guaiacol.

#### AgcA<sub>P450</sub> with 4-methylguaiacol

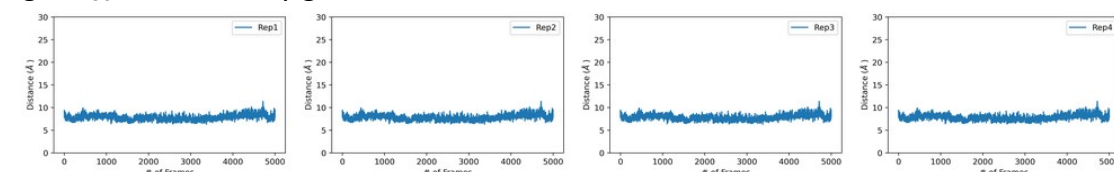

**Figure S11** Distance between I13 and A169 during the MD simulation of AgcA<sub>P450</sub> protein in complex with 4-methylguaiacol.

#### AgcA<sub>P450</sub> with 4-ethylguaiacol

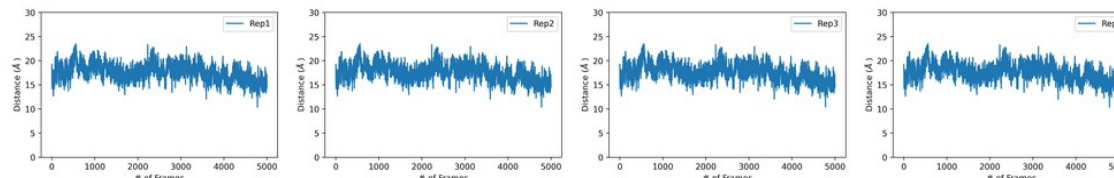

**Figure S12** Distance between I13 and A169 during the MD simulation of AgcA<sub>P450</sub> protein in complex with 4-ethylguaiacol.

#### AgcA<sub>EP4</sub> with 4-propylguaiacol

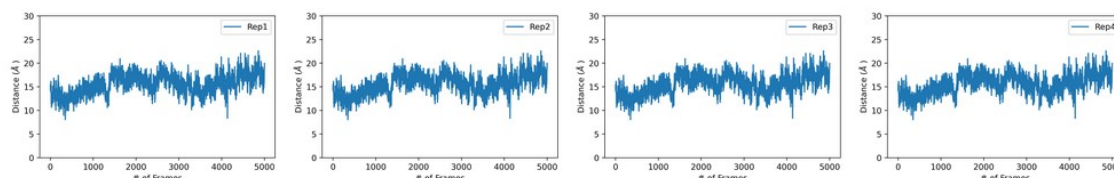

**Figure S13** Distance between I13 and A169 during the MD simulation of AgcA<sub>P450</sub> protein in complex with 4-propylguaiacol.

### Distance of the methyl group and the Iron-oxo complex of each complex

#### AgcA<sub>P450</sub> with guaiacol

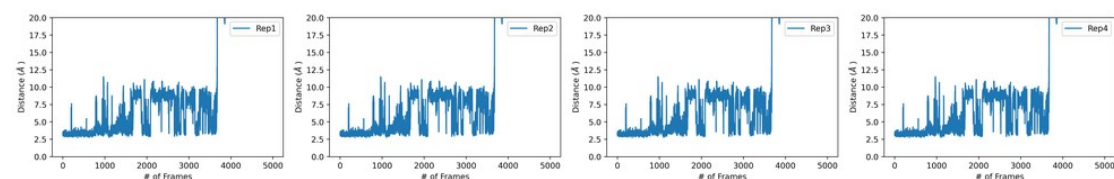

**Figure S14** Distance between the methoxy group of guaiacol and the oxygen atom of Fe(IV)=O.

### AgcA<sub>P450</sub> with 4-methylguaiacol

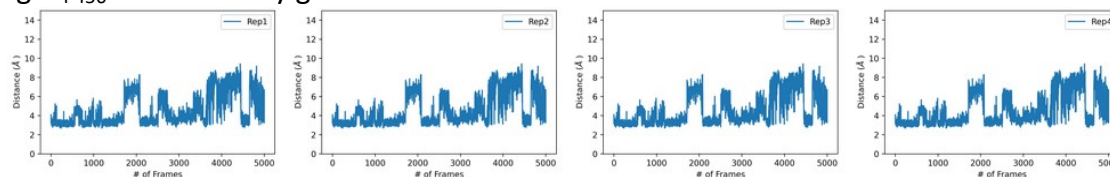

**Figure S15** Distance between the methoxy group of 4-methylguaiacol and the oxygen atom of Fe(IV)=O.

### AgcA<sub>P450</sub> with 4-ethylguaiacol

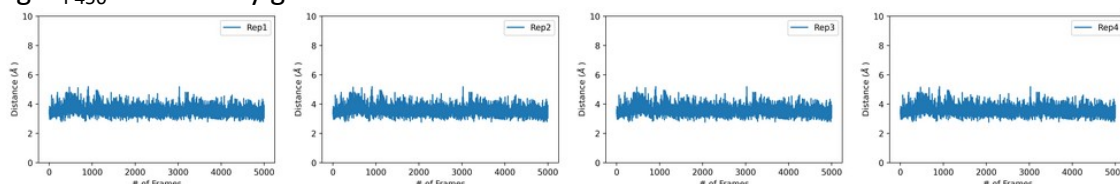

**Figure S16** Distance between the methoxy group of 4-ethylguaiacol and the oxygen atom of Fe(IV)=O.

### AgcA<sub>P450</sub> with 4-propylguaiacol

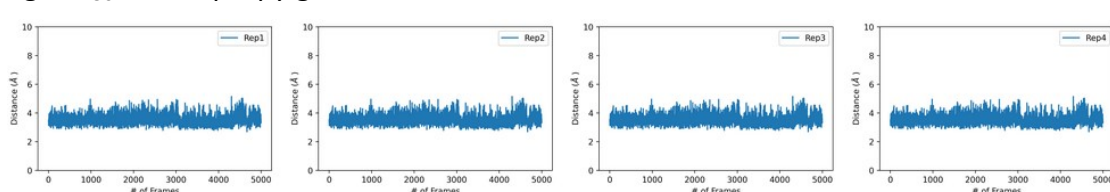

**Figure S17** Distance between the methoxy group of 4-propylguaiacol and the oxygen atom of Fe(IV)=O.

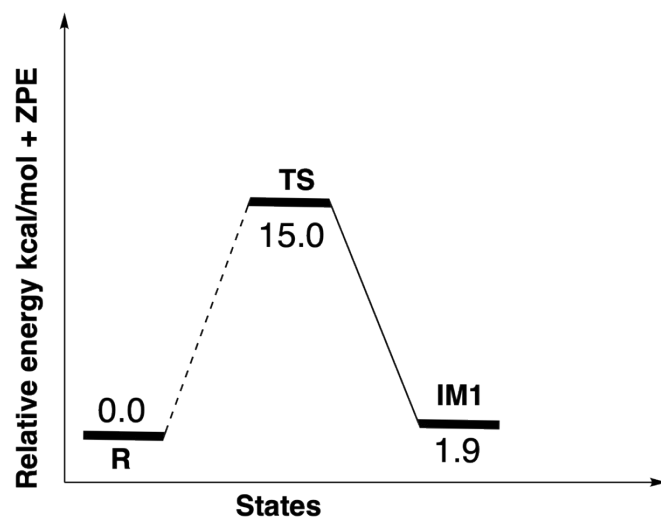

**Figure S18** The oxidation 4-propylguaiacol in the active site of AgcA<sub>P450</sub> enzyme calculated using QM/MM methods at M=4 spin of iron. The reaction profile of the hydrogen atom transfer (HAT) catalysed by Cpd I was computed using the UB3LYP functional with D3BJ dispersion correction and the def2-TZVP basis set for M=4.

**Table S1** QM/MM calculated spin densities of the oxidation 4-propylguaicol in the active site of AgcA<sub>P450</sub> at M=2

|                    | RC   | TS    | IM1   | IM2  |
|--------------------|------|-------|-------|------|
| Fe(IV)=O           | 2.11 | 1.8   | 2.11  | 1.12 |
| Porphyrin+Cysteine | -1.1 | -0.36 | -0.16 | 0.0  |
| 4-propylguaicol    | 0.0  | -0.44 | -0.96 | 0.0  |

**Table S2** QM/MM calculated spin densities of the oxidation 4-propylguaicol in the active site of AgcA<sub>P450</sub> at M=4

|                    | RC   | TS   | IM1   |
|--------------------|------|------|-------|
| Fe(IV)=O           | 2.04 | 2.11 | 2.14  |
| Porphyrin+Cysteine | 0.93 | 0.32 | -0.12 |
| 4-propylguaicol    | 0.0  | 0.55 | 0.97  |
